# Supplementary material
Source: PubMed Central journal article supplement (PMC4630811)
Supplement: NIHMS715947-supplement-1.pdf [file NIHMS715947-supplement-1.pdf]

**eTable 1. Years MML were enacted (Column I) for the 48 continuous U.S. states up to 2014 (Column I), and year states were re-coded as positive for dispensaries (Column II)\***

| <b>State</b>                                                                                                                                                                                                                                                | <b>I.<br/>Year MML<br/>was enacted</b> | <b>II.<br/>Year states were<br/>coded positive<br/>for having<br/>dispensaries*</b> |
|-------------------------------------------------------------------------------------------------------------------------------------------------------------------------------------------------------------------------------------------------------------|----------------------------------------|-------------------------------------------------------------------------------------|
| Arizona                                                                                                                                                                                                                                                     | 11/2/2010                              | 2010                                                                                |
| California                                                                                                                                                                                                                                                  | 11/8/1996                              | 2003                                                                                |
| Colorado                                                                                                                                                                                                                                                    | 11/7/2000                              | 2000                                                                                |
| Connecticut                                                                                                                                                                                                                                                 | 05/4/2012                              | 2012                                                                                |
| Delaware                                                                                                                                                                                                                                                    | 5/13/2011                              | 2011                                                                                |
| Illinois                                                                                                                                                                                                                                                    | 8/1/2013                               | 2013                                                                                |
| Maine                                                                                                                                                                                                                                                       | 11/22/1999                             | 2009                                                                                |
| Maryland                                                                                                                                                                                                                                                    | 5/22/2003                              | None                                                                                |
| Massachusetts                                                                                                                                                                                                                                               | 11/6/2012                              | 2012                                                                                |
| Michigan                                                                                                                                                                                                                                                    | 11/4/2008                              | None                                                                                |
| Minnesota                                                                                                                                                                                                                                                   | 5/29/2014                              | 2014                                                                                |
| Montana                                                                                                                                                                                                                                                     | 11/2/2004                              | 2004-2011 * *                                                                       |
| Nevada                                                                                                                                                                                                                                                      | 11/7/2000                              | None                                                                                |
| New Hampshire                                                                                                                                                                                                                                               | 7/23/2013                              | 2013                                                                                |
| New Jersey                                                                                                                                                                                                                                                  | 1/18/2010                              | 2010                                                                                |
| New Mexico                                                                                                                                                                                                                                                  | 4/3/2007                               | 2007                                                                                |
| New York                                                                                                                                                                                                                                                    | 7/5/2014                               | 2014                                                                                |
| Oregon                                                                                                                                                                                                                                                      | 12/3/1998                              | None                                                                                |
| Rhode Island                                                                                                                                                                                                                                                | 1/3/2006                               | 2009                                                                                |
| Vermont                                                                                                                                                                                                                                                     | 5/26/2004                              | 2011                                                                                |
| Washington                                                                                                                                                                                                                                                  | 11/3/1998                              | None                                                                                |
| <p>* The state MML implicitly permitted dispensing via caregivers and amounts per patient, or explicitly acknowledged dispensaries as either permitted or not declared illegal</p> <p>* * Montana was positive for these years, but not before or since</p> |                                        |                                                                                     |

eTable 2.  
Results of Sensitivity Analyses

| Sensitivity Analysis                                                  | Adjusted OR <sup>a</sup> | 95% CI      | p-value |
|-----------------------------------------------------------------------|--------------------------|-------------|---------|
| Frequency, past-month marijuana use in place of yes/no past-month use |                          |             |         |
| Overall                                                               | 0.93                     | 0.82 – 1.06 | 0.2605  |
| 8 <sup>th</sup> graders                                               | 0.72                     | 0.62 – 0.85 | <0.0001 |
| 10 <sup>th</sup> graders                                              | 1.03                     | 0.88 – 1.20 | 0.7270  |
| 12 <sup>th</sup> graders                                              | 0.97                     | 0.83 – 1.12 | 0.6391  |
| MML year adjusted to 1 year post-passage for laws passed after July   |                          |             |         |
| Overall                                                               | 0.92                     | 0.80 – 1.05 | 0.1968  |
| 8 <sup>th</sup> graders                                               | 0.71                     | 0.61 – 0.83 | <0.0001 |
| 10 <sup>th</sup> graders                                              | 1.03                     | 0.88 – 1.19 | 0.7323  |
| 12 <sup>th</sup> graders                                              | 0.95                     | 0.82 – 1.10 | 0.4772  |
| MML year adjusted from year passed to 1 year post-passage             |                          |             |         |
| Overall                                                               | 0.96                     | 0.88 – 1.05 | 0.3579  |
| 8 <sup>th</sup> graders                                               | 0.74                     | 0.65 – 0.83 | <0.0001 |
| 10 <sup>th</sup> graders                                              | 1.08                     | 0.96 – 1.21 | 0.2258  |
| 12 <sup>th</sup> graders                                              | 1.00                     | 0.89 – 1.12 | 0.9950  |
| MML year adjusted from year passed to 2 years post-passage            |                          |             |         |
| Overall                                                               | 1.08                     | 0.94 – 1.24 | 0.2862  |
| 8 <sup>th</sup> graders                                               | 0.81                     | 0.68 – 0.96 | 0.0154  |
| 10 <sup>th</sup> graders                                              | 1.21                     | 1.02 – 1.44 | 0.0275  |
| 12 <sup>th</sup> graders                                              | 1.10                     | 0.94 – 1.30 | 0.2404  |
| MML considered positive if states did <i>not</i> have dispensaries    |                          |             |         |
| Overall                                                               | 0.89                     | 0.74 – 1.08 | 0.2398  |
| 8 <sup>th</sup> graders                                               | 0.71                     | 0.57 – 0.88 | 0.0023  |
| 10 <sup>th</sup> graders                                              | 1.00                     | 0.81 – 1.24 | 0.9650  |
| 12 <sup>th</sup> graders                                              | 0.87                     | 0.70 – 1.07 | 0.1964  |
| MML considered positive if states had dispensaries                    |                          |             |         |
| Overall                                                               | 0.96                     | 0.82 – 1.13 | 0.6476  |
| 8 <sup>th</sup> graders                                               | 0.76                     | 0.63 – 0.91 | 0.0032  |
| 10 <sup>th</sup> graders                                              | 1.06                     | 0.88 – 1.27 | 0.5338  |
| 12 <sup>th</sup> graders                                              | 1.04                     | 0.87 – 1.24 | 0.6821  |
| Past-year marijuana use as outcome rather than past-month             |                          |             |         |
| Overall                                                               | 0.93                     | 0.80 – 1.09 | 0.3593  |
| 8 <sup>th</sup> graders                                               | 0.75                     | 0.64 – 0.89 | 0.0007  |
| 10 <sup>th</sup> graders                                              | 1.02                     | 0.87 – 1.19 | 0.8537  |
| 12 <sup>th</sup> graders                                              | 0.99                     | 0.84 – 1.17 | 0.9276  |

<sup>a</sup> Models adjusted for individual-, school- and state-level variables described in statistical analysis section.

## Online Supplemental Methodological Material

The multilevel logistic regression model included fixed effects and random effects at the state level as demonstrated in the SAS proc glimmix code below. Fixed effects included individual (gender, age, grade, parent education, and race), school (class size, public/private, and population density), and state (percent male, white, young, and no high school) level main effects. Additionally, fixed effect interactions for race with age and parent education were included as they improved model fit based on BIC, while no other interaction terms between individual level or individual and school level covariates improved fit. Similarly, improvement in fit based on BIC was found when random effects for race and education were included (BIC = 1519160 with race and education random effects compared to BIC = 1524079 without), indicating differential effects of these individual-level covariates across states. The final model had a ratio of the generalized chi-square to its degrees of freedom equal to 1.10, which is close to 1 and indicates that the variability in the data has been properly modeled and there is no residual overdispersion (Snijders, Tom A.B., and Bosker, Roel J. *Multilevel Analysis: An Introduction to Basic and Advanced Multilevel Modeling*, second edition. London : Sage Publishers, 2012). Contrasts were formed for the MMLstate and PrePostMML indicators in order to form the odds ratios and associated tests of interest separately by grade.

Adjusted prevalence estimates (shown in Figure 2) for MML and non-MML states across all 24 years were derived from the fitted fixed effect values from the multilevel model. Individual and school level covariates were held fixed at the overall US distributions based on the aggregation of the US census data for each year. Because states passed MML in different years, adjusted prevalence estimates for each year scale the modeled pre-post change effect by the cumulative proportion of the population exposed to MML in that particular year. For example, prior to 1996, 0% of US adolescents were exposed to MML, so none of the post-law change effect (i.e. PrePostMML) is included in the adjusted prevalence for years prior to 1996. In 1996 (when the first state, California, passed a MML) until 1997, 12% of U.S. adolescents were exposed (i.e. the % of the US adolescent population living in California) or  $12\%/46\% = 26\%$  of the adolescents who would eventually be exposed by 2014. The denominator 46% comes from the proportion of all US adolescents who are eventually exposed to MML by 2014, aggregating the 21 states that have MML. Therefore, the estimated prevalence in 1996 and 1997 includes 26.0% of the post-law change effect. In 1998, Oregon and Washington passed MML, so the US fraction exposed increased to 15.5% and therefore the estimated prevalence in MML states in 1998 incorporated 34% ( $15.5/46\%$ ) of the post-law change effect. For Tables 2 and 3, aggregate summaries of the prevalence estimates were obtained by taking simple averages of the corresponding year-specific estimates.

### SAS code for multilevel logistic regression model with interaction by grade:

The MMLstate variable is a 0-1 indicator =1 for the 21 states that pass MML between 1991-2014 and =0 for all other states (regardless of year). The PrePostMML variable is a time-varying 0-1 indicator =1 in states in the year they pass a law and for all years afterward, and =0 in states in the years before they pass a MML (including the states that did not pass MML by 2014). Year is treated as a continuous variable and yr1998 is zero for all years less than 1998 and equal to the year itself for all years from 1998 onward. Yr2006 is zero for all years less than 2006 and equal to the year itself for all years from 2006 onward. The combination of year, yr1998 and yr2006 variables form the piecewise cubic polynomial spline.

```
proc glimmix data = MTF19912014 ic=q;
  class statename age grade gender race parentEduc
    CLASS_SIZE PUBLIC POP_DENS MMLstate;
  model mj_month = age race grade gender parentEduc
    age*race race*parentEduc
    CLASS_SIZE PUBLIC POP_DENS /*school covariates*/
    MALE_PCT WHITE_PCT PCT10_24 PCT_NoHS /*state census covariates*/
    year year*year year*year*year yr1998*yr1998*yr1998
```

```
yr2006*yr2006*yr2006
MMLstate PrePostMML grade*MMLstate grade*PrePostMML
/ dist=binomial link=logit solution;
```

```
random int grade race parentEduc
year year*year year*year*year yr1998*yr1998*yr1998 yr2006*yr2006*yr2006
PrePostMML grade*PrePostMML/subject=statename s;
```

```
estimate "MMLstate 1 vs 0, 8th Graders" MMLstate -1 1 grade*MMLstate -1 1 0 0 0 0;
estimate "MMLstate 1 vs 0, 10th Graders" MMLstate -1 1 grade*MMLstate 0 0 -1 1 0 0;
estimate "MMLstate 1 vs 0, 12th Graders" MMLstate -1 1 grade*MMLstate 0 0 0 0 -1 1;
estimate "PrePostMML 1 vs 0, 8th Graders" PrePostMML 1 PrePostMML*grade 1 0 0;
estimate "PrePostMML 1 vs 0, 10th Graders" PrePostMML 1 PrePostMML*grade 0 1 0;
estimate "PrePostMML 1 vs 0, 12th Graders" PrePostMML 1 PrePostMML*grade 0 0 1;
```

```
run;
```
